# Supplementary figures and images for: Nasal high flow oxygen therapy in patients with COPD reduces respiratory rate and tissue carbon dioxide while increasing tidal and end-expiratory lung volumes: a randomised crossover trial
Source: PubMed Central journal article supplement — Thorax. 2016 Mar 25;71(8):759–61. doi: 10.1136/thoraxjnl-2015-207962 (PMC4975837; doi:10.1136/thoraxjnl-2015-207962), 2016-03-25

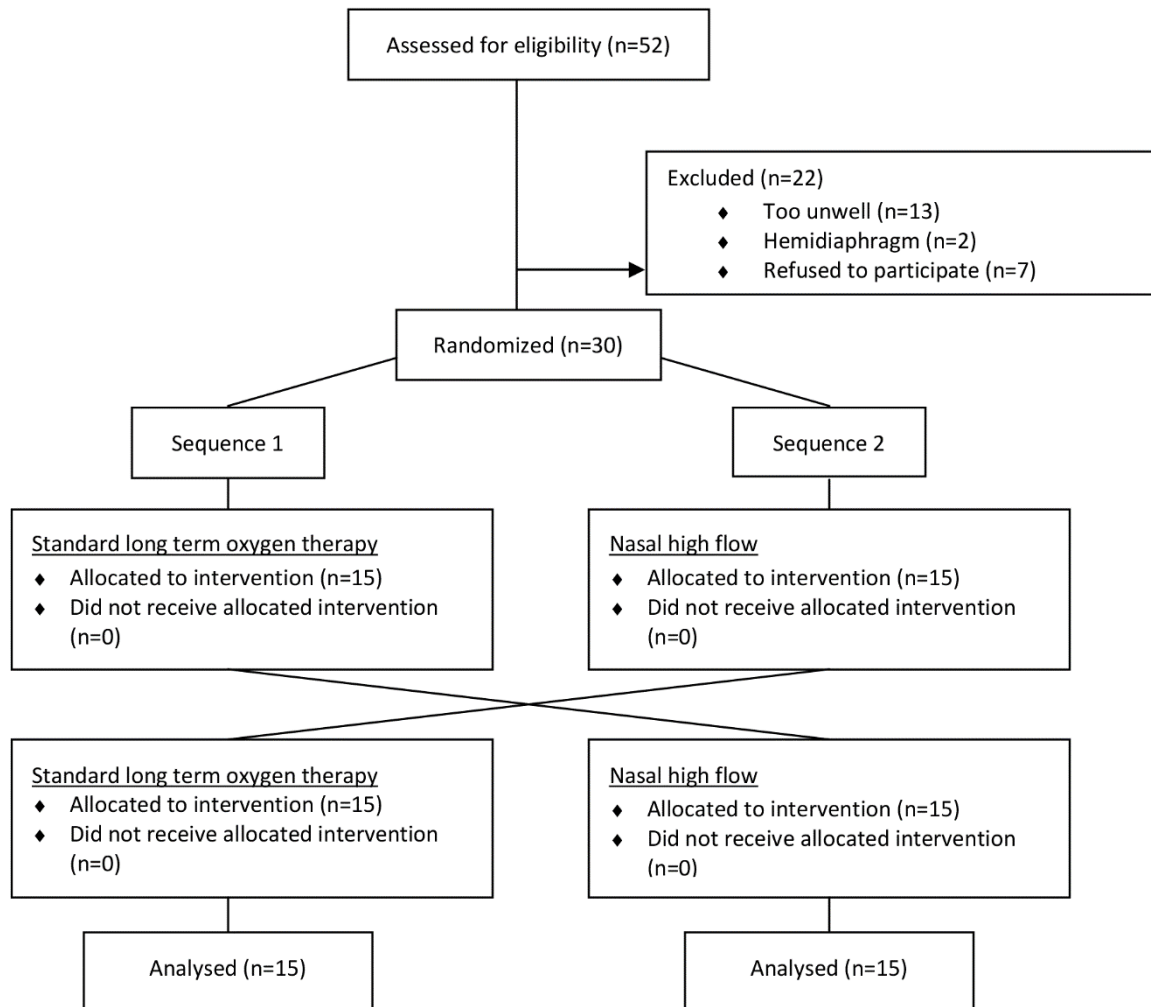

Supplement: thoraxjnl-2015-207962-s3.pdf [file thoraxjnl-2015-207962-s3.pdf]
